# Supplementary material
Source: HighWire-hosted journal article supplement (https://bmjopen.bmj.com/content/8/12/e021318)

# Supplementary file 5 Health board clustering sensitivity analysis

Table S5 - Quadratic time effects

|                                              | Intercept |                   | Monthly change |                  | Quadratic monthly change |                  |
|----------------------------------------------|-----------|-------------------|----------------|------------------|--------------------------|------------------|
|                                              | IRR       | 95% CI            | ΔIRR           | 95% CI           | ΔIRR                     | 95% CI           |
| <b>Admissions</b>                            |           |                   |                |                  |                          |                  |
| <i>Intervention</i>                          |           |                   |                |                  |                          |                  |
| Linear secular and intervention time effects | 0.010     | 0.009 to 0.011    | 1.005          | 1.003 to 1.007   | -                        | -                |
| plus quadratic time effect                   | 0.010     | 0.009 to 0.011    | 1.008          | 1.004 to 1.012   | 1.000                    | 1.000 to 1.000   |
| plus quadratic intervention effects          | 0.010     | 0.009 to 0.011    | 1.005          | 1.003 to 1.007   | -                        | -                |
| <i>Age-based counterfactual</i>              |           |                   |                |                  |                          |                  |
| Linear secular and intervention time effects | 0.066     | 0.064 to 0.069    | 1.003          | 1.002 to 1.004   | -                        | -                |
| plus quadratic time effect                   | 0.065     | 0.062 to 0.068    | 1.008          | 1.006 to 1.010   | 1.000                    | 1.000 to 1.000   |
| plus quadratic intervention effects          | 0.067     | 0.064 to 0.070    | 1.003          | 1.002 to 1.004   | -                        | -                |
| <i>Condition-based counterfactual</i>        |           |                   |                |                  |                          |                  |
| Linear secular and intervention time effects | 0.005     | 0.004 to 0.005    | 1.003          | 1.000 to 1.006   | -                        | -                |
| plus quadratic time effect                   | 0.005     | 0.004 to 0.005    | 1.004          | 0.998 to 1.011   | 1.000                    | 1.000 to 1.000   |
| plus quadratic intervention effects          | 0.005     | 0.004 to 0.005    | 1.003          | 1.000 to 1.006   | -                        | -                |
| <b>Defined Daily Doses (DDDs)</b>            |           |                   |                |                  |                          |                  |
|                                              | DDDs      | 95% CI            | ΔDDDs          | 95% CI           | ΔDDDs                    | 95% CI           |
| <i>Intervention</i>                          |           |                   |                |                  |                          |                  |
| Linear secular and intervention time effects | 29.648    | 28.711 to 30.585  | -0.036         | -0.055 to -0.017 | -                        | -                |
| plus quadratic time effect                   | 29.504    | 28.549 to 30.459  | -0.007         | -0.049 to 0.036  | -0.001                   | -0.002 to <0.001 |
| plus quadratic intervention effects          | 29.662    | 28.725 to 30.600  | -0.037         | -0.056 to -0.017 | -                        | -                |
| <i>Age-based counterfactual</i>              |           |                   |                |                  |                          |                  |
| Linear secular and intervention time effects | 100.885   | 98.067 to 103.703 | -0.052         | -0.113 to 0.009  | -                        | -                |
| plus quadratic time effect                   | 100.370   | 97.508 to 103.232 | 0.068          | -0.064 to 0.200  | -0.004                   | -0.008 to <0.001 |
| plus quadratic intervention effects          | 101.024   | 98.203 to 103.845 | -0.053         | -0.115 to 0.009  | -                        | -                |
| <i>Condition-based counterfactual</i>        |           |                   |                |                  |                          |                  |
| Linear secular and intervention time effects | 55.612    | 53.698 to 57.527  | 0.143          | 0.104 to 0.183   | -                        | -                |
| plus quadratic time effect                   | 55.119    | 53.169 to 57.069  | 0.248          | 0.160 to 0.336   | -0.003                   | -0.006 to -0.001 |
| plus quadratic intervention effects          | 55.645    | 53.729 to 57.561  | 0.141          | 0.101 to 0.181   | -                        | -                |
| <b>Cost</b>                                  |           |                   |                |                  |                          |                  |
|                                              | £         | 95% CI            | Δ£             | 95% CI           | Δ£                       | 95% CI           |
| <i>Intervention</i>                          |           |                   |                |                  |                          |                  |
| Linear secular and intervention time effects | 19.364    | 18.535 to 20.194  | 0.165          | 0.148 to 0.182   | -                        | -                |
| plus quadratic time effect                   | 19.558    | 18.714 to 20.402  | 0.124          | 0.088 to 0.161   | 0.001                    | <0.001 to 0.002  |
| plus quadratic intervention effects          | 19.350    | 18.520 to 20.180  | 0.165          | 0.149 to 0.182   | -                        | -                |
| <i>Age-based counterfactual</i>              |           |                   |                |                  |                          |                  |
| Linear secular and intervention time effects | 69.920    | 67.349 to 72.492  | 0.621          | 0.563 to 0.679   | -                        | -                |
| plus quadratic time effect                   | 70.090    | 67.480 to 72.700  | 0.579          | 0.455 to 0.704   | 0.001                    | -0.002 to 0.005  |
| plus quadratic intervention effects          | 69.998    | 67.422 to 72.574  | 0.621          | 0.561 to 0.680   | -                        | -                |
| <i>Condition-based counterfactual</i>        |           |                   |                |                  |                          |                  |
| Linear secular and intervention time effects | 26.345    | 25.349 to 27.341  | 0.149          | 0.128 to 0.170   | -                        | -                |
| plus quadratic time effect                   | 25.960    | 24.945 to 26.976  | 0.229          | 0.182 to 0.275   | -0.003                   | -0.004 to -0.001 |
| plus quadratic intervention effects          | 26.291    | 26.291 to 27.287  | 0.150          | 0.129 to 0.171   | -                        | -                |

95% CI; 95% confidence interval, DDDs; Defined daily doses per 100 patients per practice per month, ΔDDDs; change in DDDs, IR; Incidence rate per 100 patients per practice per month, IRR; incidence rate ratio, £s; gross ingredient cost of medicines before any discount per 100 patients per practice per month, Δ£s; change in £s

# Supplementary file 5 Health board clustering sensitivity analysis

Table S5 (continued) - Quadratic time effects

| Admissions                                   | Reduction step change |                  | Reduction change in slope |                  | Reduction change in slope (quadratic) |                 |
|----------------------------------------------|-----------------------|------------------|---------------------------|------------------|---------------------------------------|-----------------|
|                                              | ΔIRR                  | 95% CI           | ΔIRR                      | 95% CI           | ΔIRR                                  | 95% CI          |
| <i>Intervention</i>                          |                       |                  |                           |                  |                                       |                 |
| Linear secular and intervention time effects | 1.032                 | 0.982 to 1.084   | 0.992                     | 0.989 to 0.994   | -                                     | -               |
| plus quadratic time effect                   | 1.030                 | 0.980 to 1.083   | 0.999                     | 0.990 to 1.007   | -                                     | -               |
| plus quadratic intervention effects          | 1.082                 | 1.018 to 1.150   | 0.983                     | 0.977 to 0.990   | 1.000                                 | 1.000 to 1.000  |
| <i>Age-based counterfactual</i>              |                       |                  |                           |                  |                                       |                 |
| Linear secular and intervention time effects | 1.033                 | 1.007 to 1.059   | 0.995                     | 0.994 to 0.997   | -                                     | -               |
| plus quadratic time effect                   | 1.030                 | 1.004 to 1.057   | 1.005                     | 1.001 to 1.009   | -                                     | -               |
| plus quadratic intervention effects          | 1.069                 | 1.037 to 1.102   | 0.989                     | 0.986 to 0.992   | 1.000                                 | 1.000 to 1.000  |
| <i>Condition-based counterfactual</i>        |                       |                  |                           |                  |                                       |                 |
| Linear secular and intervention time effects | 0.952                 | 0.880 to 1.029   | 1.002                     | 0.998 to 1.005   | -                                     | -               |
| plus quadratic time effect                   | 0.951                 | 0.879 to 1.028   | 1.005                     | 0.993 to 1.018   | -                                     | -               |
| plus quadratic intervention effects          | 0.947                 | 0.860 to 1.043   | 1.002                     | 0.992 to 1.012   | 1.000                                 | 1.000 to 1.000  |
| Defined Daily Doses (DDDs)                   | ΔDDDs                 | 95% CI           | ΔDDDs                     | 95% CI           | ΔDDDs                                 | 95% CI          |
| <i>Intervention</i>                          |                       |                  |                           |                  |                                       |                 |
| Linear secular and intervention time effects | -0.113                | -0.612 to 0.386  | 0.042                     | 0.016 to 0.068   | -                                     | -               |
| plus quadratic time effect                   | -0.107                | -0.606 to 0.393  | 0.107                     | 0.020 to 0.194   | -                                     | -               |
| plus quadratic intervention effects          | -0.230                | -0.815 to 0.355  | 0.065                     | -0.002 to 0.132  | -0.001                                | -0.002 to 0.001 |
| <i>Age-based counterfactual</i>              |                       |                  |                           |                  |                                       |                 |
| Linear secular and intervention time effects | 5.065                 | 3.614 to 6.515   | 0.681                     | 0.594 to 0.768   | -                                     | -               |
| plus quadratic time effect                   | 5.144                 | 3.692 to 6.597   | 0.957                     | 0.674 to 1.240   | -                                     | -               |
| plus quadratic intervention effects          | 4.749                 | 3.158 to 6.340   | 0.759                     | 0.548 to 0.970   | -0.003                                | -0.008 to 0.002 |
| <i>Condition-based counterfactual</i>        |                       |                  |                           |                  |                                       |                 |
| Linear secular and intervention time effects | -1.876                | -2.897 to -0.855 | -0.054                    | -0.108 to 0.001  | -                                     | -               |
| plus quadratic time effect                   | -1.839                | -2.860 to -0.817 | 0.179                     | -0.003 to 0.362  | -                                     | -               |
| plus quadratic intervention effects          | -2.226                | -3.401 to -1.052 | 0.025                     | -0.114 to 0.164  | -0.002                                | -0.006 to 0.001 |
| Cost                                         | Δ£                    | 95% CI           | Δ£                        | 95% CI           | Δ£                                    | 95% CI          |
| <i>Intervention</i>                          |                       |                  |                           |                  |                                       |                 |
| Linear secular and intervention time effects | 0.230                 | -0.195 to 0.656  | -0.150                    | -0.173 to -0.128 | -                                     | -               |
| plus quadratic time effect                   | 0.217                 | -0.208 to 0.642  | -0.241                    | -0.316 to -0.165 | -                                     | -               |
| plus quadratic intervention effects          | 0.305                 | -0.186 to 0.796  | -0.165                    | -0.223 to -0.107 | 4.35e <sup>-4</sup>                   | -0.001 to 0.002 |
| <i>Age-based counterfactual</i>              |                       |                  |                           |                  |                                       |                 |
| Linear secular and intervention time effects | 4.740                 | 3.425 to 6.055   | 0.034                     | -0.051 to 0.119  | -                                     | -               |
| plus quadratic time effect                   | 4.707                 | 3.389 to 6.025   | -0.063                    | -0.333 to 0.206  | -                                     | -               |
| plus quadratic intervention effects          | 4.607                 | 3.193 to 6.020   | 0.070                     | -0.131 to 0.271  | -0.002                                | -0.006 to 0.003 |
| <i>Condition-based counterfactual</i>        |                       |                  |                           |                  |                                       |                 |
| Linear secular and intervention time effects | -3.159                | -3.703 to -2.616 | -0.010                    | -0.039 to 0.018  | -                                     | -               |
| plus quadratic time effect                   | -3.137                | -3.681 to -2.594 | 0.166                     | 0.071 to 0.262   | -                                     | -               |
| plus quadratic intervention effects          | -2.701                | -3.333 to -2.069 | -0.105                    | -0.178 to -0.031 | 0.003                                 | 0.001 to 0.005  |

95% CI; 95% confidence interval, DDDs; Defined daily doses per 100 patients per practice per month, ΔDDDs; change in DDDs, IR; Incidence rate per 100 patients per practice per month, IRR; incidence rate ratio, £s; gross ingredient cost of medicines before any discount per 100 patients per practice per month, Δ£s; change in £

# Supplementary file 5 Health board clustering sensitivity analysis

Table S5 (continued) - Quadratic time effects

| Admissions                                   | Abolition step change |                  | Abolition change in slope |                  | Abolition change in slope (quadratic) |                  |
|----------------------------------------------|-----------------------|------------------|---------------------------|------------------|---------------------------------------|------------------|
|                                              | ΔIRR                  | 95% CI           | ΔIRR                      | 95% CI           | ΔIRR                                  | 95% CI           |
| <i>Intervention</i>                          |                       |                  |                           |                  |                                       |                  |
| Linear secular and intervention time effects | 0.807                 | 0.725 to 0.899   | 0.995                     | 0.993 to 0.998   | -                                     | -                |
| plus quadratic time effect                   | 1.033                 | 0.755 to 1.413   | 1.009                     | 0.993 to 1.026   | -                                     | -                |
| plus quadratic intervention effects          | 0.750                 | 0.669 to 0.842   | 1.008                     | 1.000 to 1.016   | 1.000                                 | 0.999 to 1.000   |
| <i>Age-based counterfactual</i>              |                       |                  |                           |                  |                                       |                  |
| Linear secular and intervention time effects | 0.948                 | 0.897 to 1.001   | 0.996                     | 0.995 to 0.998   | -                                     | -                |
| plus quadratic time effect                   | 1.356                 | 1.160 to 1.585   | 1.016                     | 1.008 to 1.024   | -                                     | -                |
| plus quadratic intervention effects          | 0.890                 | 0.840 to 0.943   | 1.007                     | 1.004 to 1.011   | 1.000                                 | 1.000 to 1.000   |
| <i>Condition-based counterfactual</i>        |                       |                  |                           |                  |                                       |                  |
| Linear secular and intervention time effects | 1.015                 | 0.858 to 1.200   | 1.001                     | 0.997 to 1.005   | -                                     | -                |
| plus quadratic time effect                   | 1.171                 | 0.730 to 1.880   | 1.009                     | 0.985 to 1.034   | -                                     | -                |
| plus quadratic intervention effects          | 0.970                 | 0.812 to 1.159   | 1.009                     | 0.998 to 1.020   | 1.000                                 | 0.999 to 1.000   |
| Defined Daily Doses (DDDs)                   | ΔDDDs                 |                  | ΔDDDs                     |                  | ΔDDDs                                 |                  |
|                                              | 95% CI                | 95% CI           | 95% CI                    | 95% CI           | 95% CI                                | 95% CI           |
| <i>Intervention</i>                          |                       |                  |                           |                  |                                       |                  |
| Linear secular and intervention time effects | 6.034                 | 4.935 to 7.133   | 0.105                     | 0.078 to 0.132   | -                                     | -                |
| plus quadratic time effect                   | 8.441                 | 5.179 to 11.702  | 0.235                     | 0.067 to 0.403   | -                                     | -                |
| plus quadratic intervention effects          | 5.914                 | 4.754 to 7.074   | 0.131                     | 0.056 to 0.207   | -0.001                                | -0.003 to 0.001  |
| <i>Age-based counterfactual</i>              |                       |                  |                           |                  |                                       |                  |
| Linear secular and intervention time effects | 38.373                | 34.843 to 41.903 | 0.336                     | 0.250 to 0.421   | -                                     | -                |
| plus quadratic time effect                   | 48.598                | 38.035 to 59.161 | 0.889                     | 0.344 to 1.433   | -                                     | -                |
| plus quadratic intervention effects          | 35.666                | 31.986 to 39.347 | 0.931                     | 0.702 to 1.159   | -0.019                                | -0.025 to -0.012 |
| <i>Condition-based counterfactual</i>        |                       |                  |                           |                  |                                       |                  |
| Linear secular and intervention time effects | 6.024                 | 3.729 to 8.319   | 0.146                     | 0.090 to 0.203   | -                                     | -                |
| plus quadratic time effect                   | 14.645                | 7.802 to 21.488  | 0.612                     | 0.259 to 0.965   | -                                     | -                |
| plus quadratic intervention effects          | 6.369                 | 3.954 to 8.784   | 0.101                     | -0.054 to 0.256  | 0.002                                 | -0.003 to 0.006  |
| Cost                                         | Δ£                    |                  | Δ£                        |                  | Δ£                                    |                  |
|                                              | 95% CI                | 95% CI           | 95% CI                    | 95% CI           | 95% CI                                | 95% CI           |
| <i>Intervention</i>                          |                       |                  |                           |                  |                                       |                  |
| Linear secular and intervention time effects | -0.965                | -1.916 to -0.013 | -0.100                    | -0.124 to -0.077 | -                                     | -                |
| plus quadratic time effect                   | -4.315                | -7.148 to -1.482 | -0.281                    | -0.427 to -0.135 | -                                     | -                |
| plus quadratic intervention effects          | -0.773                | -1.774 to 0.229  | -0.141                    | -0.205 to -0.076 | 0.001                                 | -0.001 to 0.003  |
| <i>Age-based counterfactual</i>              |                       |                  |                           |                  |                                       |                  |
| Linear secular and intervention time effects | 14.242                | 10.857 to 17.627 | -0.356                    | -0.438 to -0.275 | -                                     | -                |
| plus quadratic time effect                   | 10.647                | 0.585 to 20.709  | -0.551                    | -1.069 to -0.032 | -                                     | -                |
| plus quadratic intervention effects          | 12.558                | 9.036 to 16.080  | 0.024                     | -0.191 to 0.238  | -0.012                                | -0.018 to -0.006 |
| <i>Condition-based counterfactual</i>        |                       |                  |                           |                  |                                       |                  |
| Linear secular and intervention time effects | 1.997                 | 0.791 to 3.203   | -0.115                    | -0.144 to -0.085 | -                                     | -                |
| plus quadratic time effect                   | 8.544                 | 4.956 to 12.131  | 0.239                     | 0.054 to 0.424   | -                                     | -                |
| plus quadratic intervention effects          | 2.256                 | 0.98 to 3.527    | -0.184                    | -0.266 to -0.102 | 0.002                                 | <0.001 to 0.004  |

95% CI; 95% confidence interval, DDDs; Defined daily doses per 100 patients per practice per month, ΔDDDs; change in DDDs, IR; Incidence rate per 100 patients per practice per month, IRR; incidence rate ratio, £s; gross ingredient cost of medicines before any discount per 100 patients per practice per month, Δ£s; change in £s

Supplementary file 5 Health board clustering sensitivity analysis

Figure S5 – Plots comparing the linear and quadratic time effects within the interrupted time series analysis

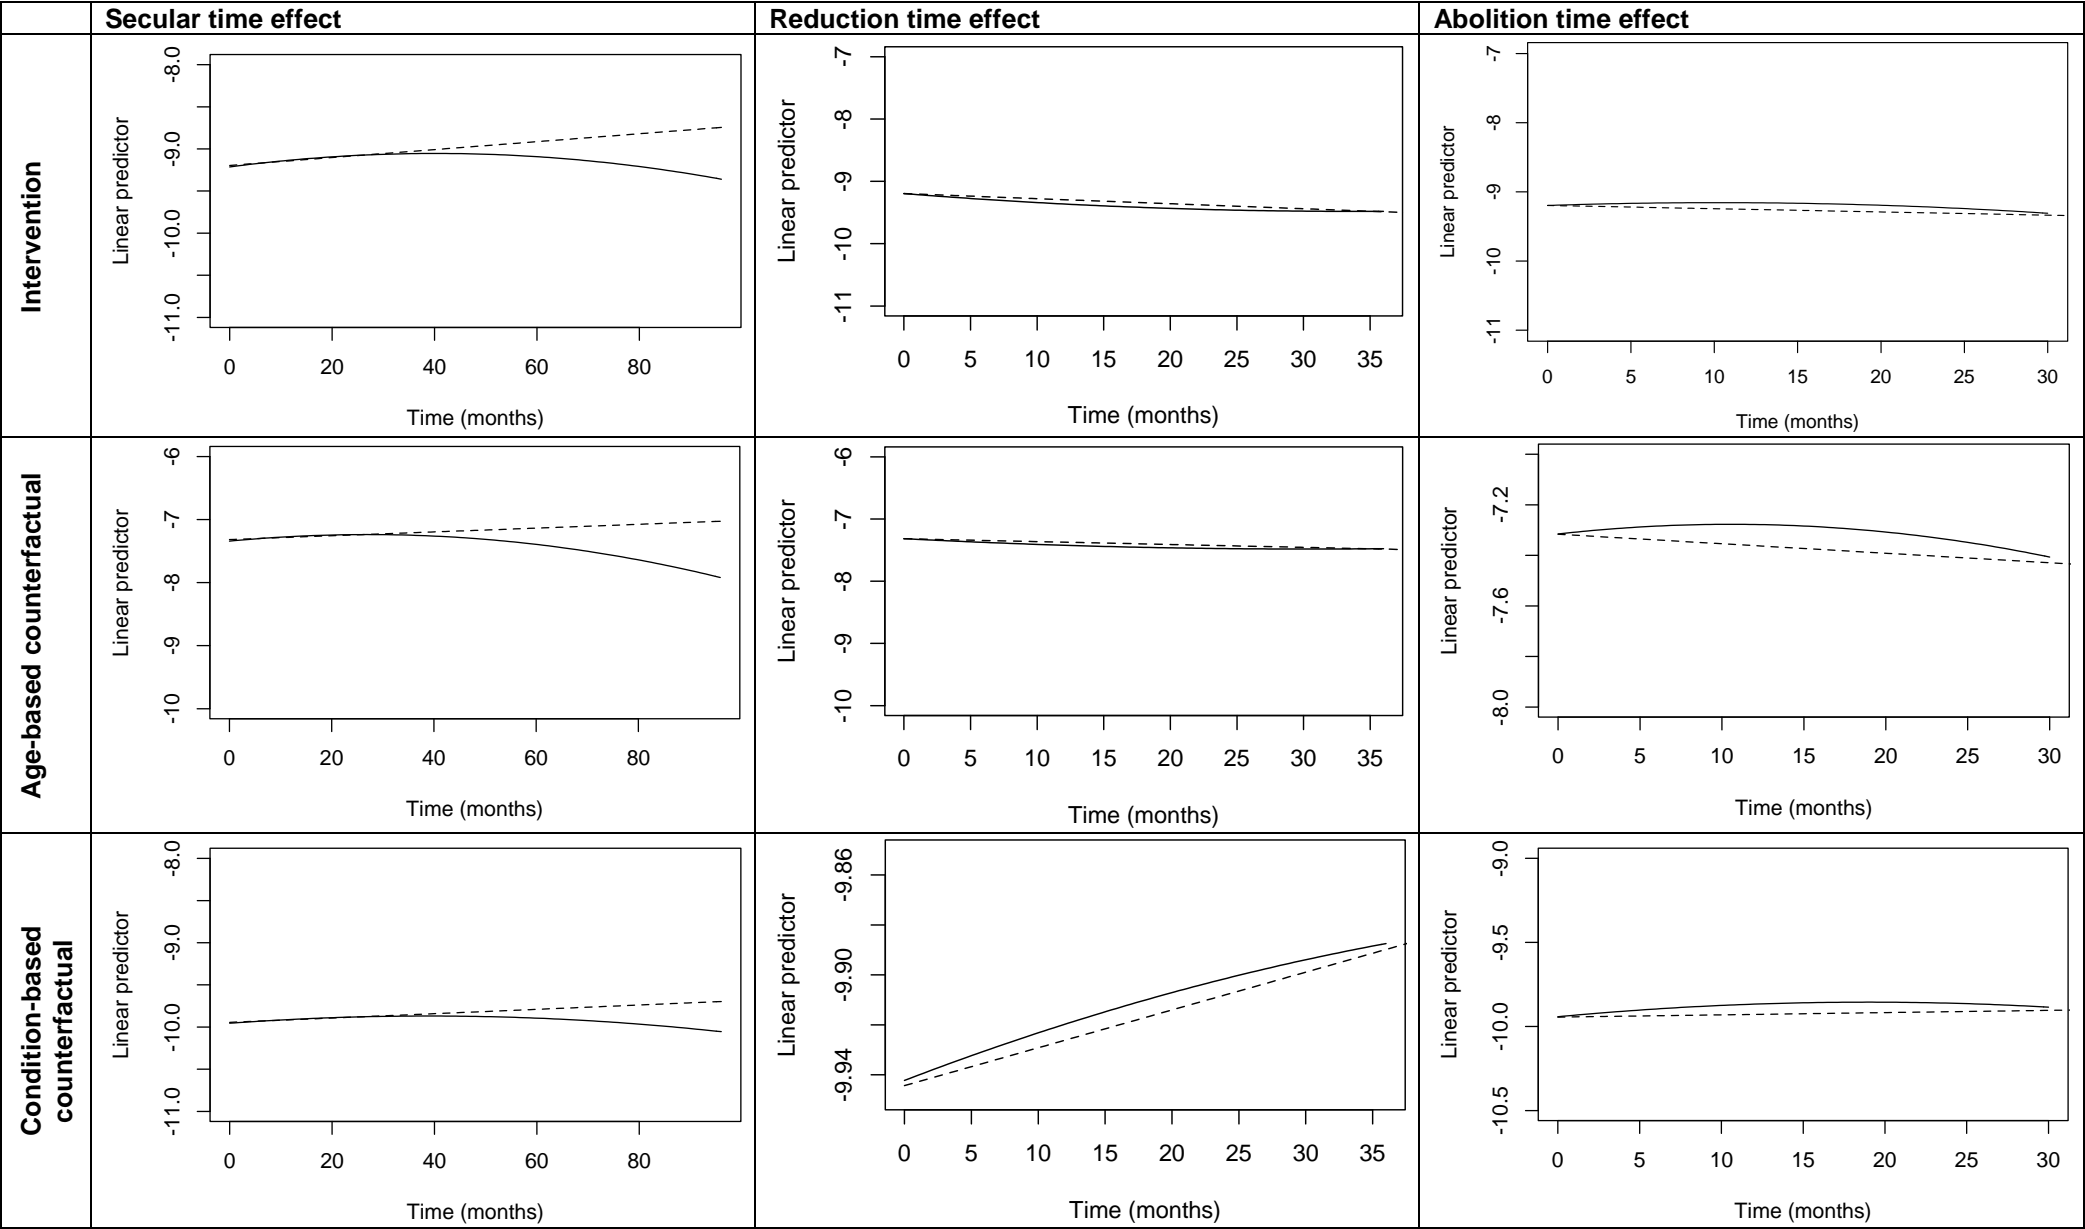

Supplement: inline-supplementary-material-5 [file inline-supplementary-material-5.pdf]
