# Supplementary material
Source: HighWire-hosted journal article supplement (https://bmjopen.bmj.com/content/8/12/e021318)

# Supplementary file 3 Generalized Additive Mixed Models sensitivity analysis

## Admissions

### Intervention

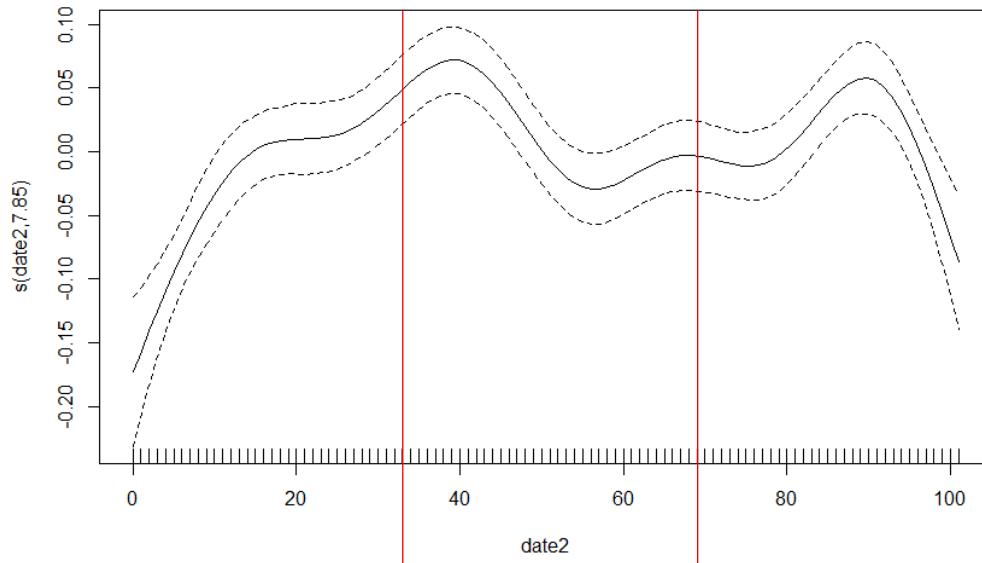

### Age counterfactual

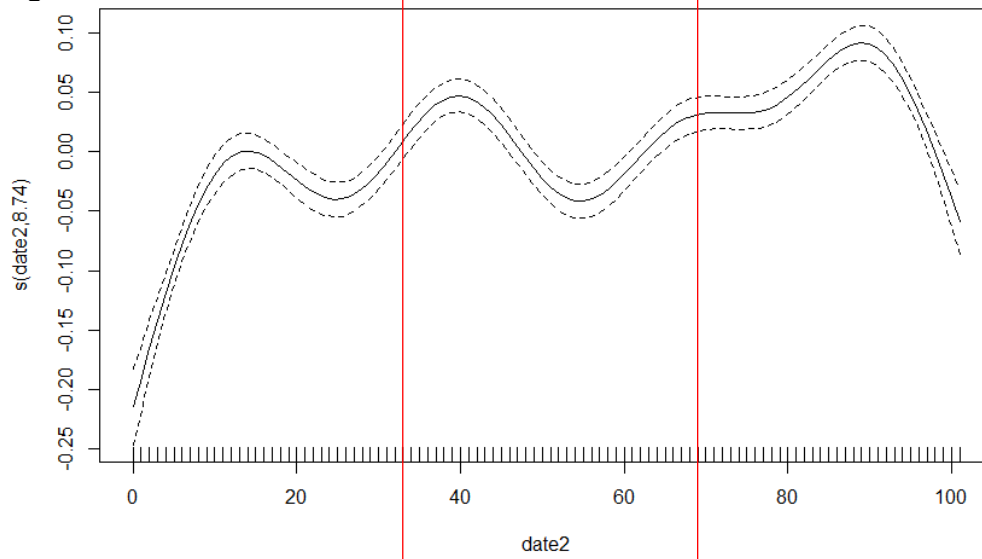

### Condition counterfactual

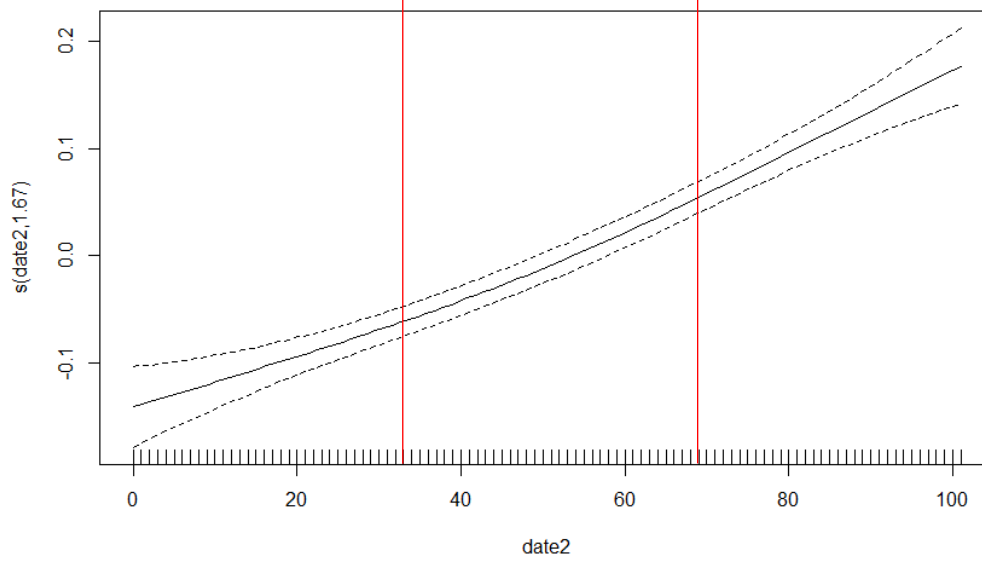

# Supplementary file 3 Generalized Additive Mixed Models sensitivity analysis

Defined Daily Doses (DDDs)

*Intervention*

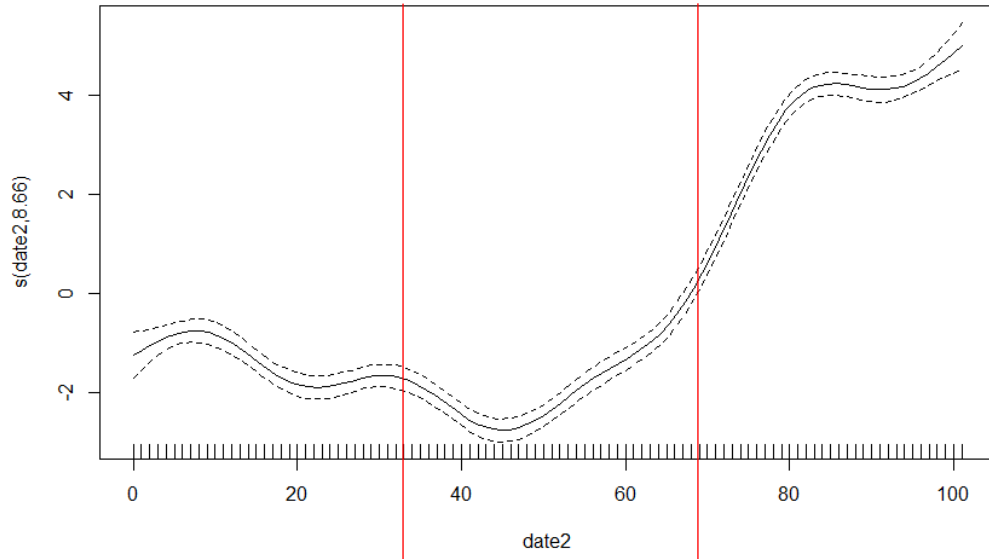

*Age counterfactual*

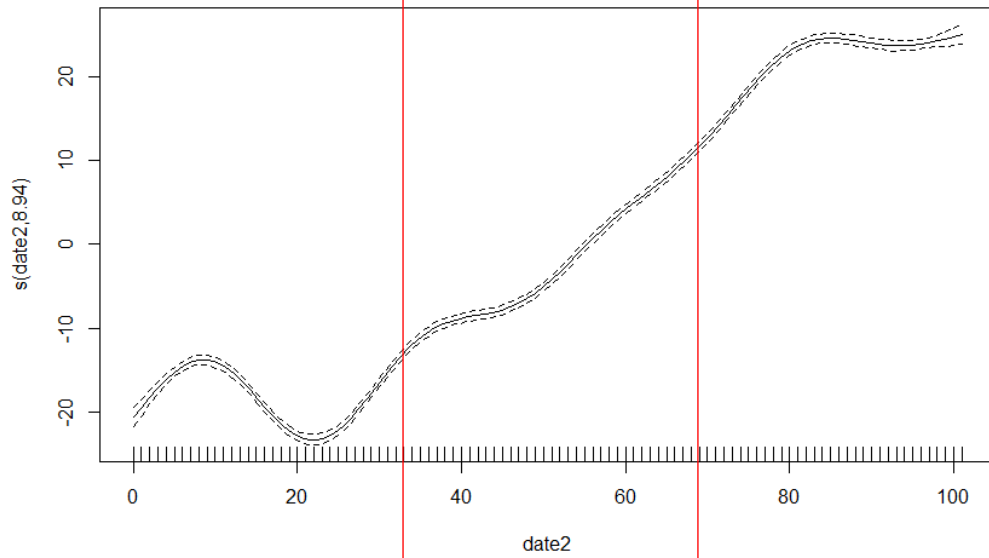

*Condition counterfactual*

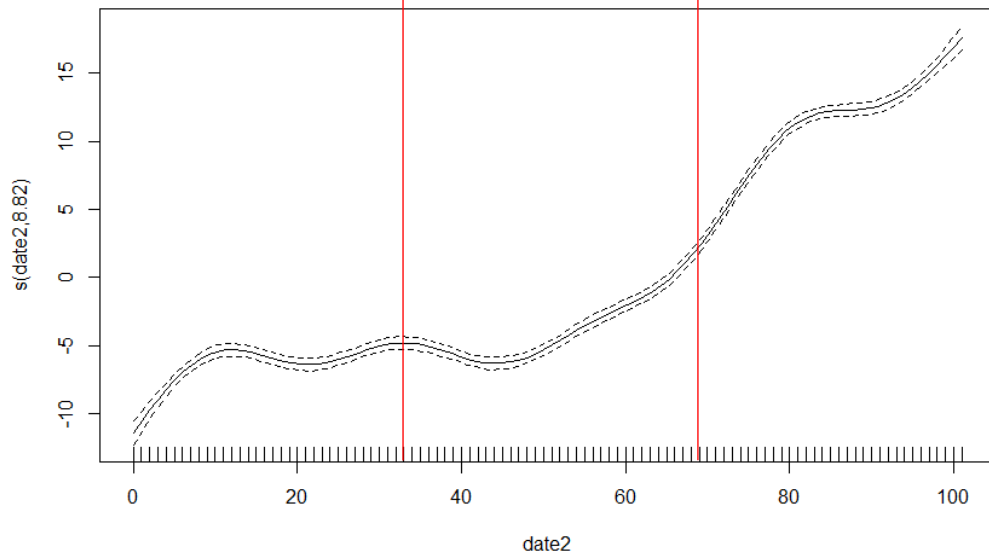

# Supplementary file 3 Generalized Additive Mixed Models sensitivity analysis

Cost

*Intervention*

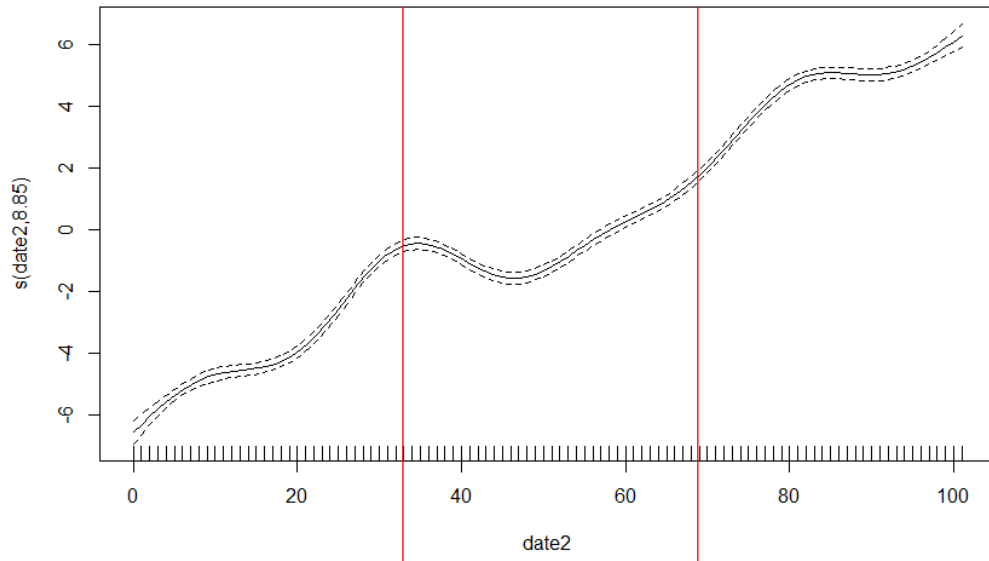

*Age counterfactual*

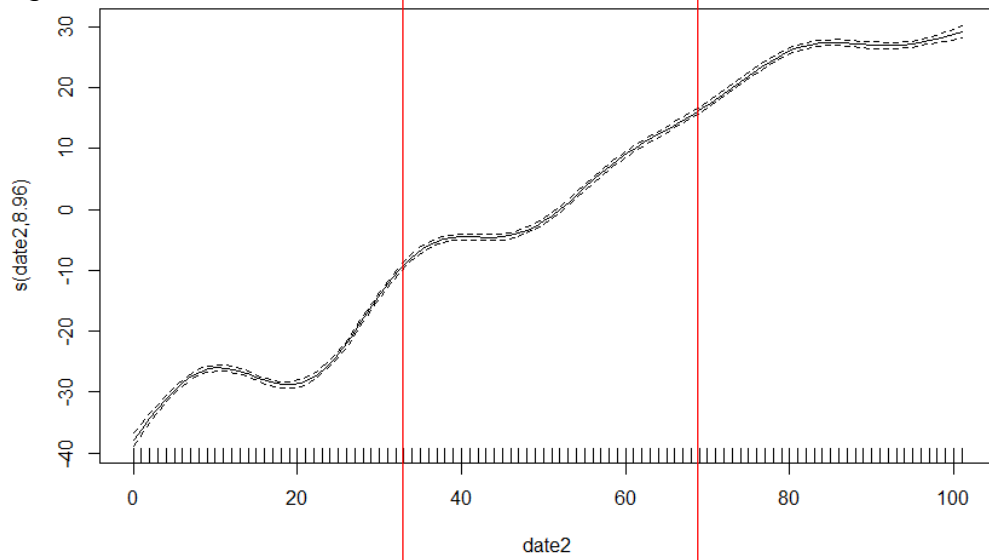

*Condition counterfactual*

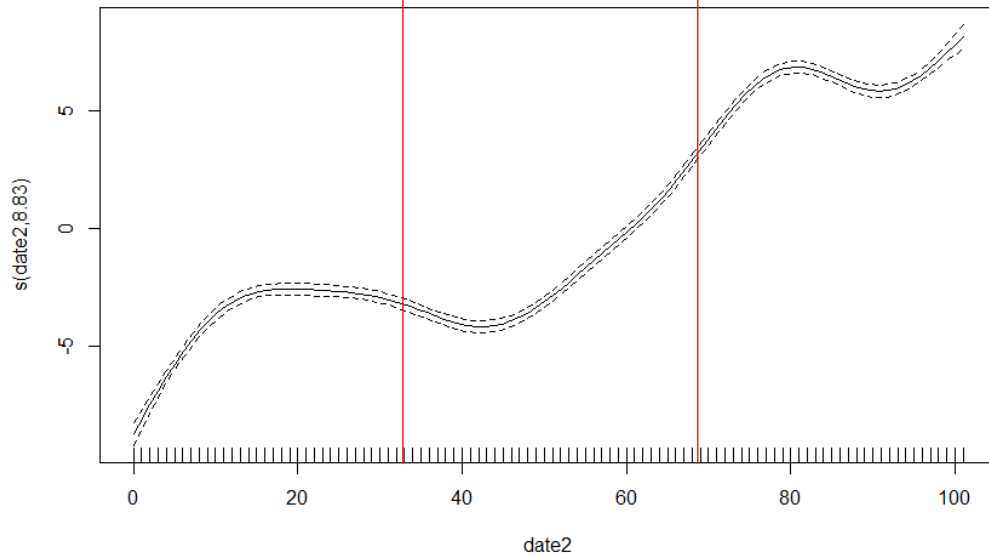

Supplement: inline-supplementary-material-3 [file inline-supplementary-material-3.pdf]
