# Supplementary material
Source: HighWire-hosted journal article supplement (https://bmjopen.bmj.com/content/8/12/e021318)
Supplement: inline-supplementary-material-4 [file inline-supplementary-material-4.pdf]

## Supplementary file 4 Health board clustering sensitivity analysis

Table S4.1 – Results of interrupted time series analysis of the impact of reducing and abolishing prescription fees in Scotland on hospital admissions (incidence rate ratios) and prescribed medicines (defined daily doses and cost) – adjusting for clustering with General Practice and Health Board

|                                   | Intercept           |                                            | Monthly change |                | Reduction step change |                | Reduction change in slope |                | Abolition step change |                | Abolition change in slope |                |
|-----------------------------------|---------------------|--------------------------------------------|----------------|----------------|-----------------------|----------------|---------------------------|----------------|-----------------------|----------------|---------------------------|----------------|
|                                   | IR                  | 95% CI                                     | IRR            | 95% CI         | IRR                   | 95% CI         | IRR                       | 95% CI         | IRR                   | 95% CI         | IRR                       | 95% CI         |
| <b>Admissions</b>                 |                     |                                            |                |                |                       |                |                           |                |                       |                |                           |                |
| Intervention                      | 9.04e <sup>-3</sup> | 7.75e <sup>-3</sup> to 1.06e <sup>-2</sup> | 1.00           | 1.00 to 1.01   | 1.03                  | 0.98 to 1.08   | 0.99                      | 0.99 to 0.99   | 0.81                  | 0.72 to 0.90   | 1.00                      | 0.99 to 1.00   |
| Age-c'fact                        | 5.70e <sup>-2</sup> | 4.95e <sup>-2</sup> to 6.56e <sup>-2</sup> | 1.00           | 1.00 to 1.00   | 1.03                  | 1.01 to 1.06   | 1.00                      | 0.99 to 1.00   | 0.95                  | 0.90 to 1.00   | 1.00                      | 0.99 to 1.00   |
| Condition-c'fact                  | 4.72e <sup>-3</sup> | 4.14e <sup>-3</sup> to 5.38e <sup>-3</sup> | 1.00           | 1.00 to 1.01   | 0.95                  | 0.88 to 1.03   | 1.00                      | 1.00 to 1.01   | 1.01                  | 0.86 to 1.20   | 1.00                      | 1.00 to 1.01   |
| <b>Admissions 1 month lag</b>     |                     |                                            |                |                |                       |                |                           |                |                       |                |                           |                |
| Intervention                      | 9.07e <sup>-3</sup> | 7.77e <sup>-3</sup> to 1.06e <sup>-2</sup> | 1.01           | 1.00 to 1.01   | 1.01                  | 0.96 to 1.06   | 0.99                      | 0.99 to 0.99   | 0.78                  | 0.71 to 0.87   | 1.00                      | 0.99 to 1.00   |
| Age-c'fact                        | 5.78e <sup>-2</sup> | 5.02e <sup>-2</sup> to 6.65e <sup>-2</sup> | 1.00           | 1.00 to 1.00   | 1.03                  | 1.01 to 1.06   | 1.00                      | 0.99 to 1.00   | 0.95                  | 0.90 to 1.00   | 1.00                      | 0.99 to 1.00   |
| Condition-c'fact                  | 4.74e <sup>-3</sup> | 4.16e <sup>-3</sup> to 5.42e <sup>-3</sup> | 1.00           | 1.00 to 1.00   | 0.98                  | 0.91 to 1.06   | 1.00                      | 1.00 to 1.00   | 1.07                  | 0.91 to 1.26   | 1.00                      | 1.00 to 1.01   |
| <b>Admissions 2 month lag</b>     |                     |                                            |                |                |                       |                |                           |                |                       |                |                           |                |
| Intervention                      | 9.09e <sup>-3</sup> | 7.79e <sup>-3</sup> to 1.06e <sup>-2</sup> | 1.00           | 1.00 to 1.01   | 1.01                  | 0.96 to 1.06   | 0.99                      | 0.99 to 0.99   | 0.79                  | 0.71 to 0.87   | 1.00                      | 0.99 to 1.00   |
| Age-c'fact                        | 5.80e <sup>-2</sup> | 5.04e <sup>-2</sup> to 6.68e <sup>-2</sup> | 1.00           | 1.00 to 1.00   | 1.04                  | 1.02 to 1.07   | 1.00                      | 0.99 to 1.00   | 0.97                  | 0.92 to 1.02   | 1.00                      | 1.00 to 1.00   |
| Condition-c'fact                  | 4.77e <sup>-3</sup> | 4.18e <sup>-3</sup> to 5.44e <sup>-3</sup> | 1.00           | 1.00 to 1.00   | 0.99                  | 0.92 to 1.07   | 1.00                      | 1.00 to 1.01   | 1.10                  | 0.93 to 1.29   | 1.00                      | 1.00 to 1.01   |
| <b>Admissions 3 month lag</b>     |                     |                                            |                |                |                       |                |                           |                |                       |                |                           |                |
| Intervention                      | 9.07e <sup>-3</sup> | 7.77e <sup>-3</sup> to 1.06e <sup>-2</sup> | 1.01           | 1.00 to 1.01   | 0.99                  | 0.94 to 1.04   | 0.99                      | 0.99 to 0.99   | 0.78                  | 0.70 to 0.86   | 1.00                      | 0.99 to 1.00   |
| Age-c'fact                        | 5.77e <sup>-2</sup> | 5.01e <sup>-2</sup> to 6.64e <sup>-2</sup> | 1.00           | 1.00 to 1.00   | 1.02                  | 1.00 to 1.05   | 1.00                      | 0.99 to 1.00   | 0.94                  | 0.90 to 0.99   | 1.00                      | 1.00 to 1.00   |
| Condition-c'fact                  | 4.74e <sup>-3</sup> | 4.15e <sup>-3</sup> to 5.40e <sup>-3</sup> | 1.00           | 1.00 to 1.00   | 0.97                  | 0.90 to 1.05   | 1.00                      | 1.00 to 1.01   | 1.08                  | 0.92 to 1.26   | 1.00                      | 1.00 to 1.00   |
| <b>Defined Daily Doses (DDDs)</b> |                     |                                            |                |                |                       |                |                           |                |                       |                |                           |                |
| Intervention                      | 33.21               | 30.30 to 36.12                             | -0.04          | -0.06 to -0.02 | -0.11                 | -0.61 to 0.38  | 0.04                      | 0.02 to 0.07   | 6.03                  | 4.93 to 7.13   | 0.10                      | 0.08 to 0.13   |
| Age-c'fact                        | -                   | -                                          | -              | -              | -                     | -              | -                         | -              | -                     | -              | -                         | -              |
| Condition-c'fact                  | 59.82               | 54.81 to 64.82                             | 0.14           | 0.10 to 0.18   | -1.88                 | -2.90 to -0.86 | -0.05                     | -0.11 to <0.01 | 6.02                  | 3.72 to 8.31   | 0.15                      | 0.09 to 0.20   |
| <b>Cost</b>                       |                     |                                            |                |                |                       |                |                           |                |                       |                |                           |                |
| Intervention                      | £ 22.44             | 20.11 to 24.77                             | £ 0.17         | 0.15 to 0.18   | £ 0.23                | -0.20 to 0.65  | £ -0.15                   | -0.17 to -0.13 | £ -0.97               | -1.92 to -0.02 | £ -0.10                   | -0.12 to -0.08 |
| Age-c'fact                        | £ 67.90             | 62.04 to 73.76                             | £ 0.62         | 0.56 to 0.68   | £ 4.74                | 3.43 to 6.06   | £ 0.03                    | -0.05 to 0.12  | £ 14.26               | 10.87 to 17.65 | £ -0.36                   | -0.44 to -0.27 |
| Condition-c'fact                  | £ 29.61             | 26.75 to 32.47                             | £ 0.15         | 0.13 to 0.17   | £ -3.16               | -3.70 to -2.62 | £ -0.01                   | -0.04 to 0.02  | £ 1.99                | 0.78 to 3.20   | £ -0.11                   | -0.14 to -0.09 |

95% CI; 95% confidence interval, c'fact; counterfactual, DDDs; Defined daily doses per 100 patients per practice per month, ΔDDD; change in DDDs, IR; Incidence rate per 100 patients per practice per month, IRR; incidence rate ratio, £; gross ingredient cost of medicines before any discount per 100 patients per practice per month, Δ£; change in £

## Supplemental file 4 Health board clustering sensitivity analysis

Table S4.2 - Results of interrupted time series analysis of the impact of reducing and abolishing prescription fees in Scotland on hospital admissions (incidence rate ratios) and prescribed medicines (defined daily doses and cost) stratified by quintile of the Scottish Index of Multiple Deprivation [19] – adjusting for clustering with General Practice and Health Board

|                                   | Intercept           |                                            | Monthly change |                | Reduction step change |                | Reduction change in slope |               | Abolition step change |               | Abolition change in slope |               |
|-----------------------------------|---------------------|--------------------------------------------|----------------|----------------|-----------------------|----------------|---------------------------|---------------|-----------------------|---------------|---------------------------|---------------|
|                                   | IR                  | 95% CI                                     | IRR            | 95% CI         | IRR                   | 95% CI         | IRR                       | 95% CI        | IRR                   | 95% CI        | IRR                       | 95% CI        |
| <b>Admissions</b>                 |                     |                                            |                |                |                       |                |                           |               |                       |               |                           |               |
| Q1 - most deprived                | 9.08e <sup>-2</sup> | 7.67e <sup>-2</sup> to 1.08e <sup>-1</sup> | 1.01           | 1.00 to 1.01   | 1.02                  | 0.97 to 1.06   | 0.99                      | 0.99 to 1.00  | 0.87                  | 0.79 to 0.97  | 0.99                      | 0.99 to 1.00  |
| Q2                                | 1.17e <sup>-2</sup> | 9.36e <sup>-3</sup> to 1.47e <sup>-2</sup> | 1.00           | 1.00 to 1.01   | 1.10                  | 0.92 to 1.32   | 0.99                      | 0.98 to 1.00  | 0.75                  | 0.50 to 1.12  | 1.00                      | 0.99 to 1.01  |
| Q3                                | 9.80e <sup>-3</sup> | 7.03e <sup>-3</sup> to 1.37e <sup>-2</sup> | 1.00           | 0.99 to 1.01   | 1.10                  | 0.86 to 1.41   | 1.00                      | 0.98 to 1.01  | 1.15                  | 0.68 to 1.94  | 1.00                      | 0.99 to 1.02  |
| Q4                                | 6.51e <sup>-3</sup> | 4.62e <sup>-3</sup> to 9.18e <sup>-3</sup> | 0.99           | 0.98 to 1.00   | 1.50                  | 1.13 to 1.99   | 1.00                      | 0.99 to 1.02  | 1.63                  | 0.89 to 2.99  | 1.02                      | 1.01 to 1.04  |
| Q5 - least deprived               | 6.06e <sup>-3</sup> | 4.86e <sup>-3</sup> to 7.54e <sup>-3</sup> | 1.00           | 0.99 to 1.00   | 1.00                  | 0.84 to 1.21   | 1.00                      | 1.00 to 1.01  | 1.24                  | 0.85 to 1.82  | 1.00                      | 0.99 to 1.01  |
| <b>Admissions 1 month lag</b>     |                     |                                            |                |                |                       |                |                           |               |                       |               |                           |               |
| Q1 - most deprived                | 1.45e <sup>-2</sup> | 1.23e <sup>-2</sup> to 1.72e <sup>-2</sup> | 1.01           | 1.01 to 1.02   | 0.94                  | 0.86 to 1.03   | 0.99                      | 0.98 to 0.99  | 0.60                  | 0.49 to 0.73  | 0.99                      | 0.98 to 0.99  |
| Q2                                | 1.20e <sup>-2</sup> | 9.58e <sup>-3</sup> to 1.51e <sup>-2</sup> | 1.00           | 1.00 to 1.01   | 1.12                  | 0.93 to 1.34   | 0.99                      | 0.98 to 1.00  | 0.79                  | 0.53 to 1.16  | 1.00                      | 0.99 to 1.01  |
| Q3                                | 9.77e <sup>-3</sup> | 6.99e <sup>-3</sup> to 1.37e <sup>-2</sup> | 1.00           | 0.99 to 1.01   | 1.00                  | 0.78 to 1.27   | 1.00                      | 0.99 to 1.01  | 0.99                  | 0.60 to 1.65  | 1.00                      | 0.99 to 1.02  |
| Q4                                | 6.84e <sup>-3</sup> | 4.83e <sup>-3</sup> to 9.67e <sup>-3</sup> | 0.99           | 0.98 to 1.00   | 1.53                  | 1.16 to 2.02   | 1.00                      | 0.99 to 1.01  | 1.66                  | 0.91 to 3.00  | 1.02                      | 1.01 to 1.04  |
| Q5 - least deprived               | 6.12e <sup>-3</sup> | 4.90e <sup>-3</sup> to 7.64e <sup>-3</sup> | 1.00           | 0.99 to 1.00   | 1.03                  | 0.86 to 1.23   | 1.01                      | 1.00 to 1.01  | 1.27                  | 0.87 to 1.85  | 1.00                      | 0.99 to 1.01  |
| <b>Admissions 2 month lag</b>     |                     |                                            |                |                |                       |                |                           |               |                       |               |                           |               |
| Q1 - most deprived                | 1.46e <sup>-2</sup> | 1.24e <sup>-2</sup> to 1.73e <sup>-2</sup> | 1.01           | 1.01 to 1.01   | 0.94                  | 0.86 to 1.03   | 0.99                      | 0.98 to 0.99  | 0.60                  | 0.50 to 0.73  | 0.99                      | 0.98 to 0.99  |
| Q2                                | 1.20e <sup>-2</sup> | 9.58e <sup>-3</sup> to 1.51e <sup>-2</sup> | 1.00           | 1.00 to 1.01   | 1.11                  | 0.92 to 1.33   | 0.99                      | 0.98 to 1.00  | 0.78                  | 0.54 to 1.15  | 1.00                      | 0.99 to 1.01  |
| Q3                                | 1.00e <sup>-2</sup> | 1.00e <sup>-2</sup> to 1.40e <sup>-2</sup> | 1.00           | 0.99 to 1.01   | 1.07                  | 0.84 to 1.37   | 1.00                      | 0.99 to 1.01  | 1.12                  | 0.68 to 1.84  | 1.00                      | 0.99 to 1.02  |
| Q4                                | 6.80e <sup>-3</sup> | 4.81e <sup>-3</sup> to 9.60e <sup>-3</sup> | 0.99           | 0.98 to 1.00   | 1.57                  | 1.19 to 2.07   | 1.00                      | 0.98 to 1.01  | 1.70                  | 0.95 to 3.05  | 1.02                      | 1.00 to 1.03  |
| Q5 - least deprived               | 6.21e <sup>-3</sup> | 4.98e <sup>-3</sup> to 7.75e <sup>-3</sup> | 0.99           | 0.99 to 1.00   | 1.09                  | 0.91 to 1.31   | 1.00                      | 1.00 to 1.01  | 1.38                  | 0.95 to 1.99  | 1.00                      | 0.99 to 1.01  |
| <b>Admissions 3 month lag</b>     |                     |                                            |                |                |                       |                |                           |               |                       |               |                           |               |
| Q1 - most deprived                | 1.47e <sup>-2</sup> | 1.24e <sup>-2</sup> to 1.74e <sup>-2</sup> | 1.01           | 1.01 to 1.01   | 0.94                  | 0.86 to 1.02   | 0.99                      | 0.98 to 0.99  | 0.60                  | 0.50 to 0.73  | 0.99                      | 0.98 to 0.99  |
| Q2                                | 1.18e <sup>-2</sup> | 9.40e <sup>-3</sup> to 1.48e <sup>-2</sup> | 1.01           | 1.00 to 1.01   | 1.03                  | 0.86 to 1.24   | 0.99                      | 0.98 to 1.00  | 0.72                  | 0.50 to 1.05  | 1.00                      | 0.99 to 1.01  |
| Q3                                | 1.03e <sup>-2</sup> | 7.38e <sup>-3</sup> to 1.43e <sup>-2</sup> | 1.00           | 0.99 to 1.00   | 1.18                  | 0.92 to 1.51   | 1.00                      | 0.99 to 1.01  | 1.25                  | 0.76 to 2.05  | 1.01                      | 0.99 to 1.02  |
| Q4                                | 6.43e <sup>-3</sup> | 4.55e <sup>-3</sup> to 9.07e <sup>-3</sup> | 0.99           | 0.98 to 1.00   | 1.34                  | 1.02 to 1.77   | 1.00                      | 0.98 to 1.01  | 1.36                  | 0.77 to 2.39  | 1.01                      | 1.00 to 1.03  |
| Q5 - least deprived               | 6.15e <sup>-3</sup> | 4.93e <sup>-3</sup> to 7.67e <sup>-3</sup> | 1.00           | 0.99 to 1.00   | 1.07                  | 0.89 to 1.28   | 1.00                      | 0.99 to 1.01  | 1.35                  | 0.94 to 1.94  | 1.00                      | 0.99 to 1.01  |
| <b>Defined Daily Doses (DDDs)</b> |                     |                                            |                |                |                       |                |                           |               |                       |               |                           |               |
| Q1 - most deprived                | 24.46               | 21.29 to 27.62                             | -0.07          | -0.10 to -0.04 | 0.25                  | -0.50 to 1.01  | 0.08                      | 0.04 to 0.12  | 6.23                  | 4.59 to 7.86  | 0.14                      | 0.10 to 0.18  |
| Q2                                | 29.64               | 25.30 to 33.99                             | 0.05           | -0.03 to 0.12  | -1.83                 | -3.80 to 0.15  | -0.05                     | -0.15 to 0.05 | 2.09                  | -2.19 to 6.37 | 0.03                      | -0.07 to 0.14 |
| Q3                                | 35.64               | 31.29 to 39.98                             | -0.06          | -0.18 to 0.06  | 1.11                  | -2.07 to 4.28  | -0.03                     | -0.20 to 0.13 | 7.32                  | 0.27 to 14.37 | 0.15                      | -0.02 to 0.32 |
| Q4                                | 37.99               | 34.12 to 41.87                             | -0.05          | -0.14 to 0.03  | 0.12                  | -2.06 to 2.31  | 0.06                      | -0.05 to 0.17 | 7.62                  | 2.87 to 12.38 | 0.09                      | -0.03 to 0.21 |
| Q5 - least deprived               | 30.20               | 28.03 to 32.37                             | 0.02           | -0.02 to 0.06  | -1.15                 | -2.24 to -0.05 | 9.05e <sup>-4</sup>       | -0.06 to 0.06 | 4.21                  | 1.83 to 6.60  | 0.01                      | -0.05 to 0.06 |

## Supplemental file 4 Health board clustering sensitivity analysis

| Cost                | Intercept |                | Monthly change |              | Reduction step change |               | Reduction change in slope |                | Abolition step change |                | Abolition change in slope |                |
|---------------------|-----------|----------------|----------------|--------------|-----------------------|---------------|---------------------------|----------------|-----------------------|----------------|---------------------------|----------------|
|                     | £s        | 95% CI         | Δ£s            | 95% CI       | Δ£s                   | 95% CI        | Δ£s                       | 95% CI         | Δ£s                   | 95% CI         | Δ£s                       | 95% CI         |
| Q1 - most deprived  | 17.49     | 14.36 to 20.62 | 0.07           | 0.05 to 0.09 | 0.37                  | -0.24 to 0.98 | -0.06                     | -0.09 to -0.03 | 1.02                  | -0.32 to 2.36  | -0.02                     | -0.05 to 0.02  |
| Q2                  | 22.94     | 17.26 to 17.26 | 0.21           | 0.14 to 0.28 | -0.88                 | -2.67 to 0.90 | -0.21                     | -0.30 to -0.12 | -2.63                 | -6.59 to 1.32  | -0.18                     | -0.28 to -0.09 |
| Q3                  | 22.97     | 19.33 to 26.60 | 0.20           | 0.10 to 0.29 | 0.83                  | -1.55 to 3.20 | -0.25                     | -0.38 to -0.13 | -1.67                 | -6.95 to 3.62  | -0.08                     | -0.21 to 0.04  |
| Q4                  | 24.86     | 21.27 to 28.46 | 0.22           | 0.14 to 0.30 | 0.14                  | -1.92 to 2.21 | -0.24                     | -0.35 to -0.13 | -2.63                 | -7.26 to 2.01  | -0.19                     | -0.30 to -0.08 |
| Q5 - least deprived | 20.76     | 17.57 to 23.94 | 0.20           | 0.17 to 0.24 | -0.78                 | -1.72 to 0.16 | -0.18                     | -0.23 to -0.14 | -2.67                 | -4.76 to -0.58 | -0.18                     | -0.23 to -0.13 |

95% CI; 95% confidence interval; DDDs; Defined daily doses per 100 patients per practice per month, ΔDDD; change in DDDs, IR; Incidence rate per 100 patients per practice per month, IRR; incidence rate ratio, £s; gross ingredient cost of medicines before any discount per 100 patients per practice per month, Δ£s; change in £s, Q1-5; quintiles of the Scottish Index of Multiple Deprivation from most to least deprived
